# Supplementary material
Source: publisher figshare collection journal article supplement (https://acs.figshare.com/ndownloader/files/7588198)
Supplement: Supplementary file 1 [file 7588198]

## **Supporting Information**

### **Dominating Role of Ni<sup>0</sup> on the Interface of Ni/NiO for Enhanced Hydrogen Evolution Reaction**

Jing Wang, Shanjun Mao, Zeyan Liu, Zhongzhe Wei, Haiyan Wang, Yiqing Chen, Yong Wang\*

Advanced Materials and Catalysis Group, Center for Chemistry of High-performance and Novel Materials, Department of Chemistry, Zhejiang University, Hangzhou 310028, P. R. China.

\*Corresponding Author: chemwy@zju.edu.cn

**Table S1.** The preparation parameters of different samples.

| <b>Samples</b>            | <b>Melamine<br/>[g]</b> | <b>Ni(NO<sub>3</sub>)<sub>2</sub>·6H<sub>2</sub>O<br/>[g]</b> | <b>Temperature<br/>[°C]</b> | <b>Holding Time<br/>[h]</b> |
|---------------------------|-------------------------|---------------------------------------------------------------|-----------------------------|-----------------------------|
| NiO <sub>x</sub> @NC-700  | 20                      | 1.11                                                          | 700                         | 1                           |
| NiO <sub>x</sub> @BCNTs   | 20                      | 1.11                                                          | 700                         | 2                           |
| NiO <sub>x</sub> @NC-800  | 20                      | 1.11                                                          | 800                         | 1                           |
| NiO <sub>x</sub> @NC-900  | 20                      | 1.11                                                          | 900                         | 1                           |
| NiO <sub>x</sub> @NC-1000 | 20                      | 1.11                                                          | 1000                        | 1                           |
| NiO                       | --                      | 1.11                                                          | 800                         | 1                           |

**Table S2.** Textural properties of the catalysts.

| <b>entry</b> | <b>catalyst</b>           | <b>BET surface area<br/>(m<sup>2</sup>/g)</b> | <b>pore volume<br/>(cm<sup>3</sup>/g)</b> | <b>pore size<br/>(nm)</b> |
|--------------|---------------------------|-----------------------------------------------|-------------------------------------------|---------------------------|
| 1            | NiO <sub>x</sub> @BCNTs   | 314                                           | 0.52                                      | 5.24                      |
| 2            | NiO <sub>x</sub> @NC-800  | 318                                           | 0.48                                      | 5.36                      |
| 3            | NiO <sub>x</sub> @NC-900  | 217                                           | 0.33                                      | 5.39                      |
| 4            | NiO <sub>x</sub> @NC-1000 | 197                                           | 0.31                                      | 5.73                      |

**Table S3.** Ni, NiO and N contents of the catalysts.

| entry | catalyst                             | Ni/% | NiO/% | N % <sup>b</sup><br>(atomic%) |
|-------|--------------------------------------|------|-------|-------------------------------|
| 1     | NiO <sub>x</sub> @BCNTs              | 36.2 | 63.8  | 3.58                          |
| 2     | NiO <sub>x</sub> @NC-800             | 32.8 | 67.2  | 3.32                          |
| 3     | NiO <sub>x</sub> @NC-900             | 24.3 | 75.7  | 2.78                          |
| 4     | NiO <sub>x</sub> @NC-1000            | 11.6 | 88.4  | 4.66                          |
| 5     | H <sub>2</sub> -TPR-400 <sup>a</sup> | 37.0 | 63.0  | --                            |
| 6     | H <sub>2</sub> -TPR-550 <sup>a</sup> | 46.2 | 53.8  | --                            |
| 7     | H <sub>2</sub> -TPR-650 <sup>a</sup> | 50.7 | 49.3  | --                            |
| 8     | H <sub>2</sub> -TPR-750 <sup>a</sup> | 56.6 | 43.4  | --                            |
| 9     | H <sub>2</sub> -TPR-850 <sup>a</sup> | 62.6 | 37.4  | --                            |

[a] NiO<sub>x</sub>@BCNTs was treated via H<sub>2</sub>-TPR process under different temperature.

[b] The atomic percentage of N calculated from XPS data.

**Table S4.** Summary of the recently reported solid-state HER catalysts in basic electrolytes.

| Catalyst                                                             | $\eta$ -j <sup>b</sup> | TS <sup>c</sup> | Stability | Electrolyte solution | Reference                                                |
|----------------------------------------------------------------------|------------------------|-----------------|-----------|----------------------|----------------------------------------------------------|
| NiO <sub>x</sub> @BCNTs<br>(~0.40 mg cm <sup>-2</sup> ) <sup>a</sup> | 183-10                 | 119             | 10 h      | 1 M KOH              | This work                                                |
| NiO <sub>x</sub> @BCNTs<br>(~3.18 mg cm <sup>-2</sup> ) <sup>a</sup> | 79-10<br>181-30        |                 |           |                      |                                                          |
| CoO <sub>x</sub> @CN                                                 | 232-10                 | 115             | 1.67 h    | 1 M KOH              | <i>J. Am. Chem. Soc.</i> <b>2015</b> , 137, 2688         |
| Ni-Mo-alloy on Ti foil                                               | ~80-10                 | --              | 100 h     | 1 M NaOH             | <i>ACS Catal.</i> <b>2013</b> , 3, 166                   |
| Co-NRCNTs                                                            | 370-10                 | 69              | 10 h      | 1 M KOH              | <i>Angew. Chem. Int. Ed.</i> <b>2014</b> , 53, 4372      |
| NiO/Ni-CNT                                                           | <100-10                | 82              | 2 h       | 1 M KOH              | <i>Nat. Commun.</i> <b>2014</b> , 4695                   |
| Ni                                                                   | 400-10                 | --              | --        | 1 M KOH              | <i>Angew. Chem. Int. Ed.</i> <b>2012</b> , 51, 12703     |
| Ni/MWCNT                                                             | ~350-10                | 102             | --        | 1 M KOH              | <i>J. Power Sources</i> <b>2014</b> , 266, 365           |
| MnNi                                                                 | 360-10                 | --              | 2 h       | 1 M KOH              | <i>Adv. Funct. Mater.</i> <b>2015</b> , 25, 393          |
| Ni-NiO/N-rGO                                                         | 160                    | 46              | 11.1 h    | 1 M KOH              | <i>Adv. Funct. Mater.</i> <b>2015</b> , 25, 5799         |
| Ni@C NSs                                                             | 270                    | 143             | 12 h      | 1 M KOH              | <i>J. Mater. Chem. A</i> , <b>2016</b> , 4, 7297         |
| Ni-G                                                                 | 75-1                   | 182             | 1 h       | 0.1 M KOH            | <i>Int. J. Hydrogen Energy</i> , <b>2016</b> , 41, 3786  |
| NiP nanospheres                                                      | 434-50                 | 122             | 11.1 h    | 1 M NaOH             | <i>Int. J. Hydrogen Energy</i> , <b>2016</b> , 41, 20515 |
| Ni-S/CeO <sub>2</sub>                                                | 170-30                 | 165.6           | --        | 1 M NaOH             | <i>Int. J. Hydrogen Energy</i> , <b>2016</b> , 41, 20485 |

[a] The loading mass was based on the mass of nickel.

[b]  $\eta$  (mV) stands for the overpotential at current density of j (mA cm<sup>-2</sup>).

[c] TS represents Tafel slope (mV dec<sup>-1</sup>).

**Table S5.** Exchange current density of the catalysts.

| entry | catalyst                  | Exchange current density / mA cm <sup>-2</sup> |
|-------|---------------------------|------------------------------------------------|
| 1     | NiO <sub>x</sub> @BCNTs   | 0.308                                          |
| 2     | NiO <sub>x</sub> @NC-800  | 0.214                                          |
| 3     | NiO <sub>x</sub> @NC-900  | 0.212                                          |
| 4     | NiO <sub>x</sub> @NC-1000 | 0.171                                          |

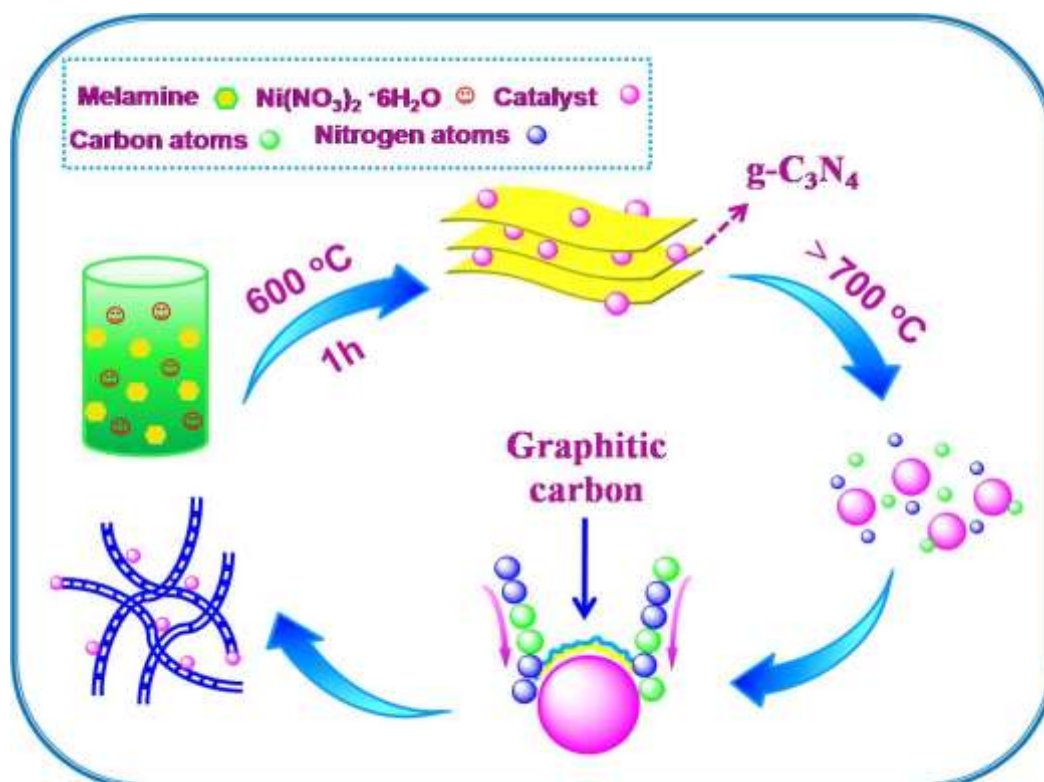**Scheme S1.** Scheme for the fabrication of NiO<sub>x</sub>@BCNTs.

In our case, thermal condensation of melamine formed layered graphitic carbon nitride (g-C<sub>3</sub>N<sub>4</sub>) at low-temperature zone (<600 °C).<sup>1</sup> The Ni species were partially reduced to metallic Ni NPs by reductive groups decomposed from g-C<sub>3</sub>N<sub>4</sub> as the temperature rises. On the other hand, the g-C<sub>3</sub>N<sub>4</sub> also acted as precursor to deposit nitrogen-doped carbon around the Ni NPs.<sup>2</sup> A high pyrolysis temperature or long holding period probably resulted in a sufficient decomposition of g-C<sub>3</sub>N<sub>4</sub>, and thus high concentrations of nitrogen and carbon fragments around the Ni NPs, which promoted the growth of nitrogen-doped carbon nanotubes. As a consequence, the Ni NPs were encapsulated in nitrogen-doped carbon shells. The experiment results show that controlled parameter in the experiment can lead to the production of BCNTs.

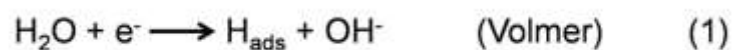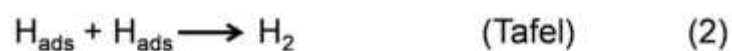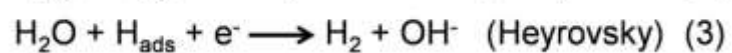

**Scheme S2.** Hydrogen evolution reaction mechanism.

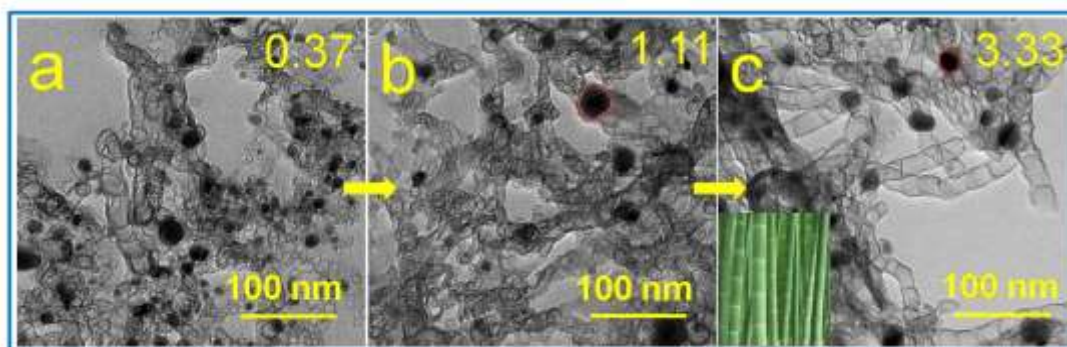

**Figure S1.** TEM images of samples with different  $\text{Ni}(\text{NO}_3)_2 \cdot 6\text{H}_2\text{O}$  concentration calcinated at  $800^\circ\text{C}$ , 1 h, a) 0.37 g, b) 1.11 g, c) 3.33 g.

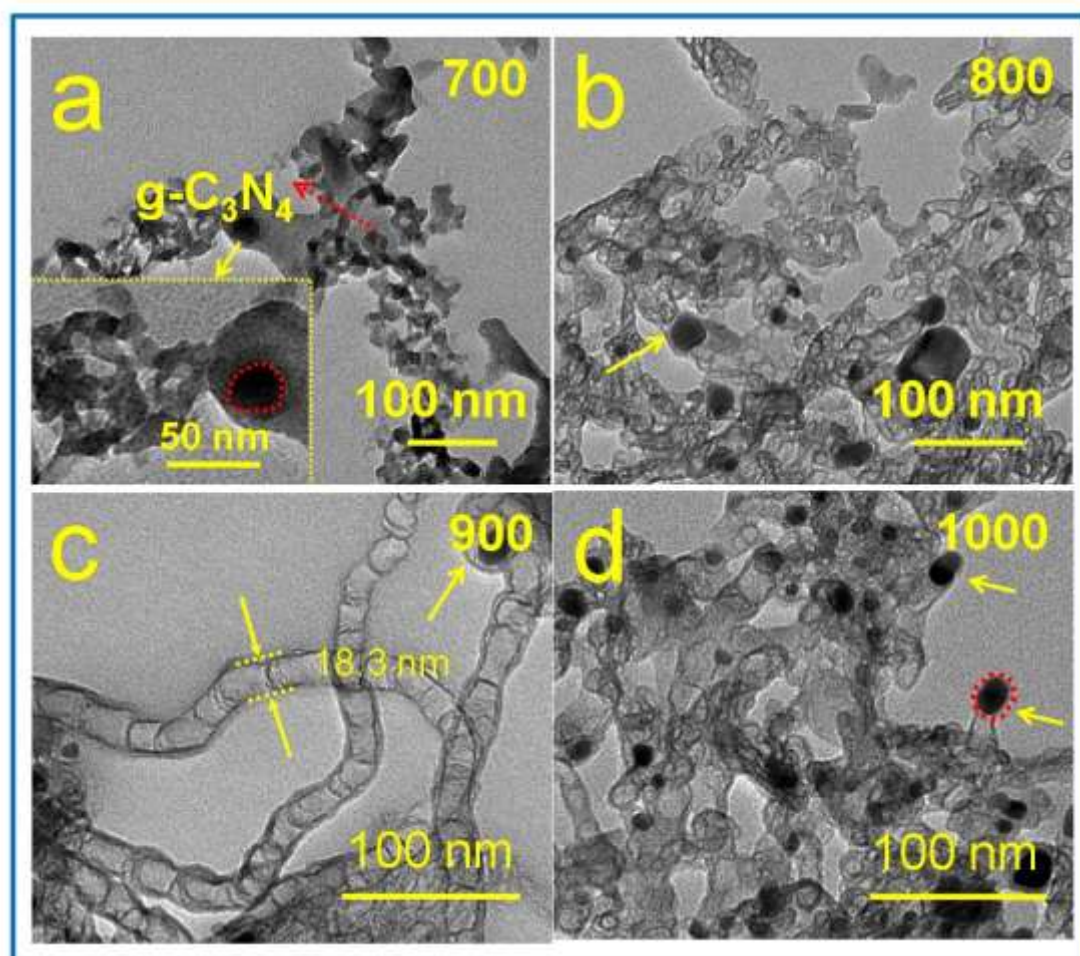

**Figure S2.** TEM images of samples with 1.11 g  $\text{Ni}(\text{NO}_3)_2 \cdot 6\text{H}_2\text{O}$  calcinated at a)  $700^\circ\text{C}$ , 1 h; b)  $800^\circ\text{C}$ , 1 h; c)  $900^\circ\text{C}$ , 1 h; d)  $1000^\circ\text{C}$ , 1 h.



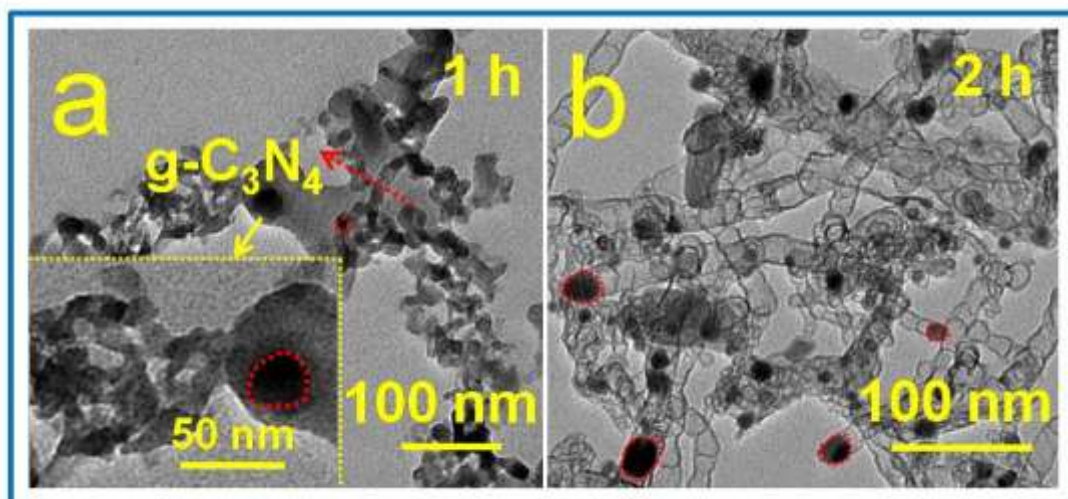

**Figure S3.** TEM images of samples with 1.11 g  $\text{Ni}(\text{NO}_3)_2 \cdot 6\text{H}_2\text{O}$  calcinated at 700 °C with different holding time a) 1 h ( $\text{NiO}_x@\text{NC-700}$ ), b) 2 h ( $\text{NiO}_x@\text{BCNTs}$ ).

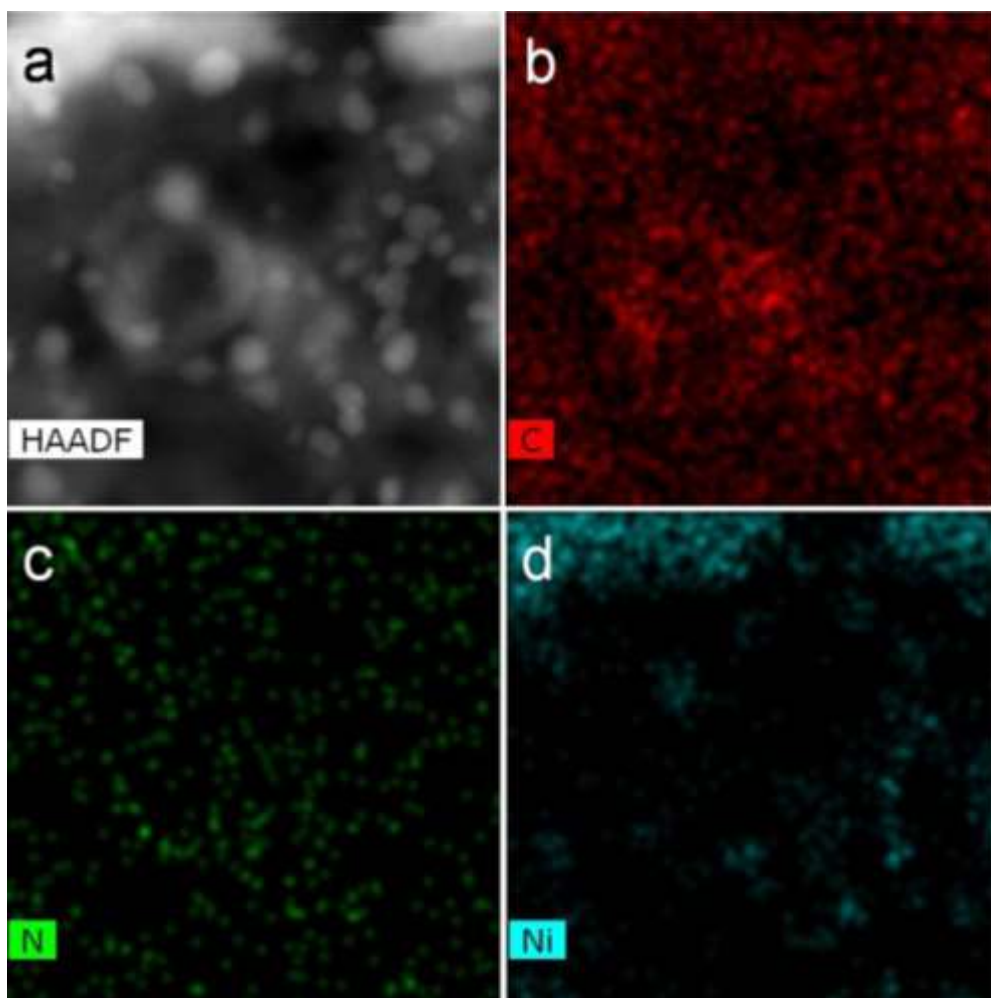

**Figure S4.** EDX elemental mapping of  $\text{NiO}_x@\text{BCNTs}$ .

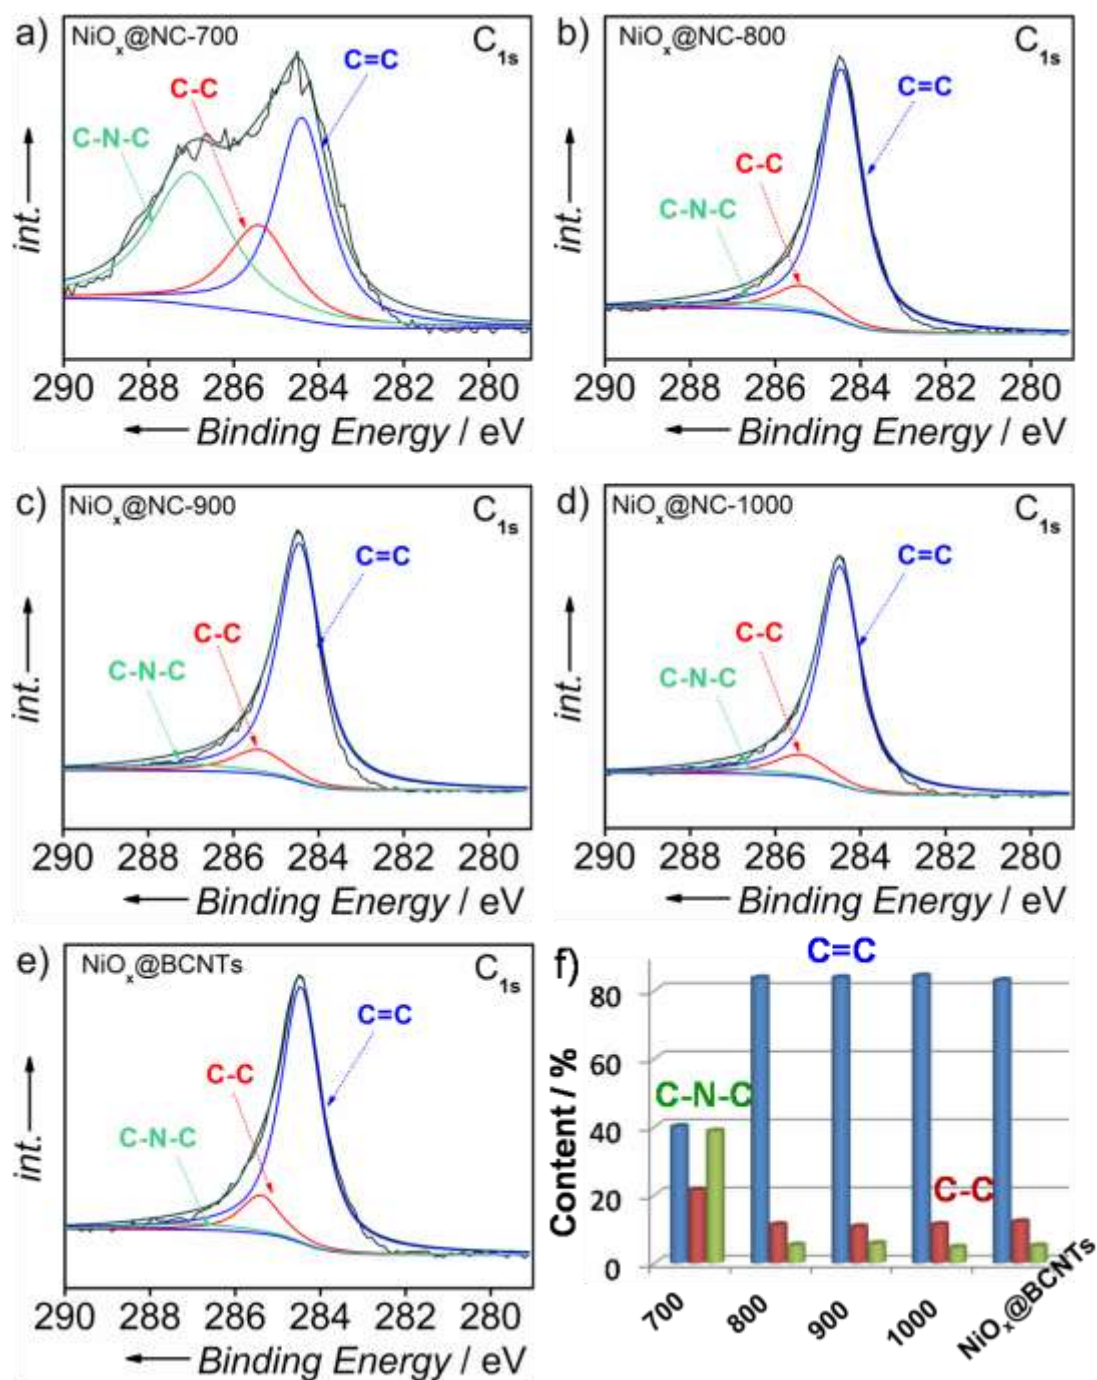

**Figure S5.** a, b, c, d, e) High-resolution  $C_{1s}$  XPS spectra of  $NiO_x@NC-700$ ,  $NiO_x@NC-800$ ,  $NiO_x@NC-900$ ,  $NiO_x@NC-1000$  and  $NiO_x@BCNTs$ . f) The content of the  $C=C$ ,  $C-C$  and  $C-N-C$  species in products.



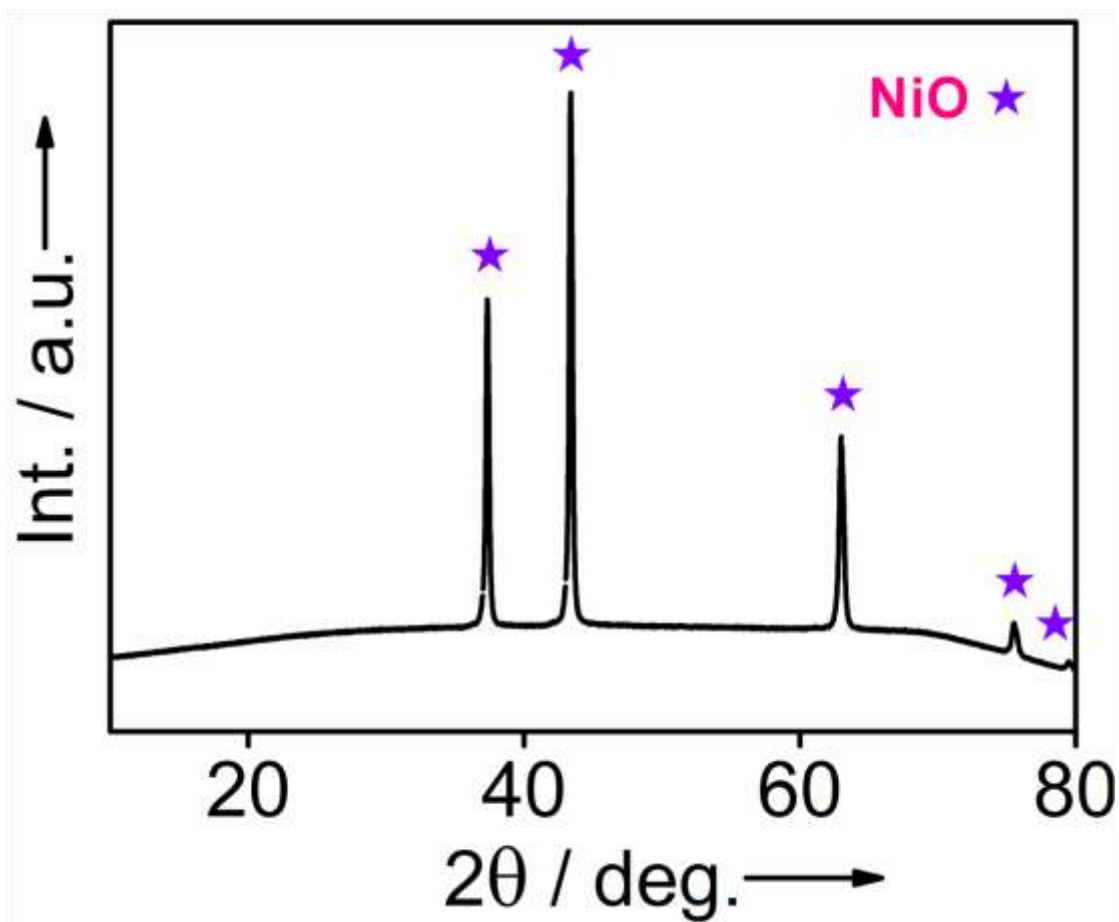

**Figure S6.** XRD of NiO calcinated at 800 °C for 1 h.

On the basis of XRD analysis (Figure S6), the characteristic peaks of contrast sample that directly calcinated  $\text{Ni}(\text{NO}_3)_2 \cdot 6\text{H}_2\text{O}$  were assigned to NiO.

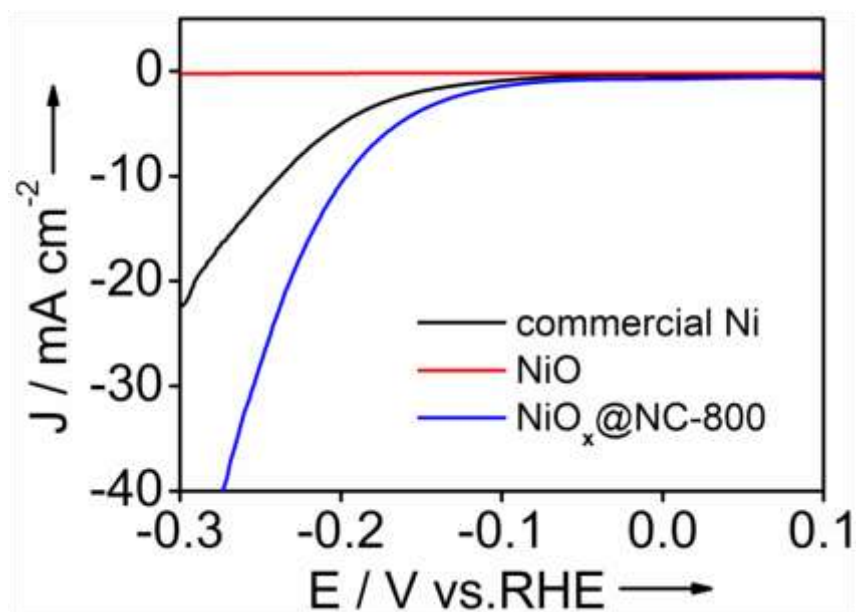

**Figure S7.** Polarization curves for control samples of commercial Ni, NiO and  $\text{NiO}_x@NC-800$  in 1 M KOH.

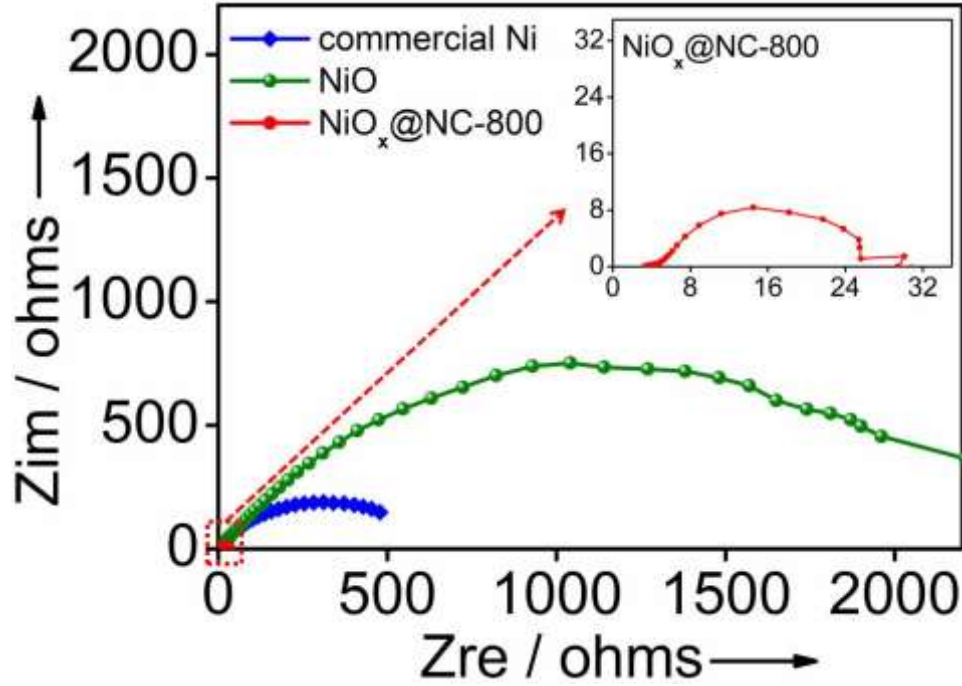

**Figure S8.** EIS spectra of commercial Ni, NiO and NiO<sub>x</sub>@NC-800. The insert showed the enlarged EIS spectra of NiO<sub>x</sub>@NC-800.

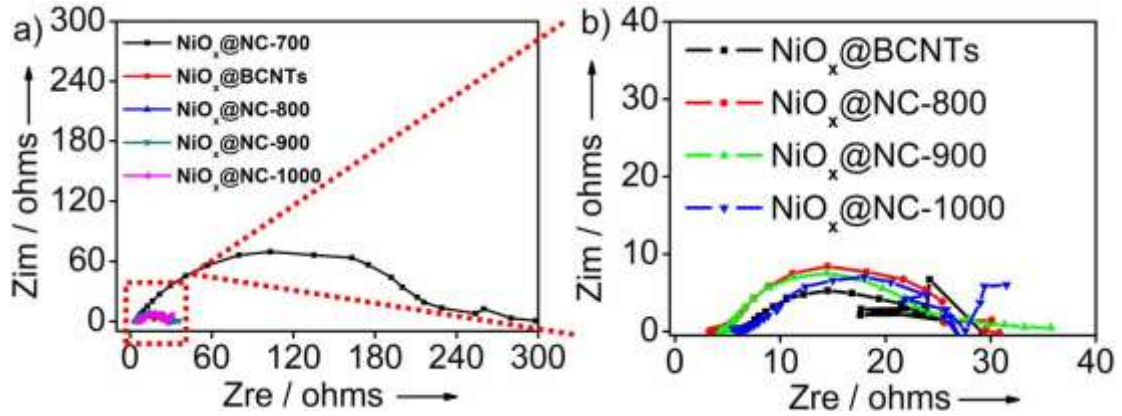

**Figure S9.** a) EIS spectra of samples calcinated at 700 °C, 1 h, 700 °C, 2h (NiO<sub>x</sub>@BCNTs); 800 °C, 1 h; 900 °C, 1 h; 1000 °C, 1 h. b) The enlarged EIS spectra of samples NiO<sub>x</sub>@BCNTs; 800 °C, 1 h; 900 °C, 1 h; 1000 °C, 1 h.

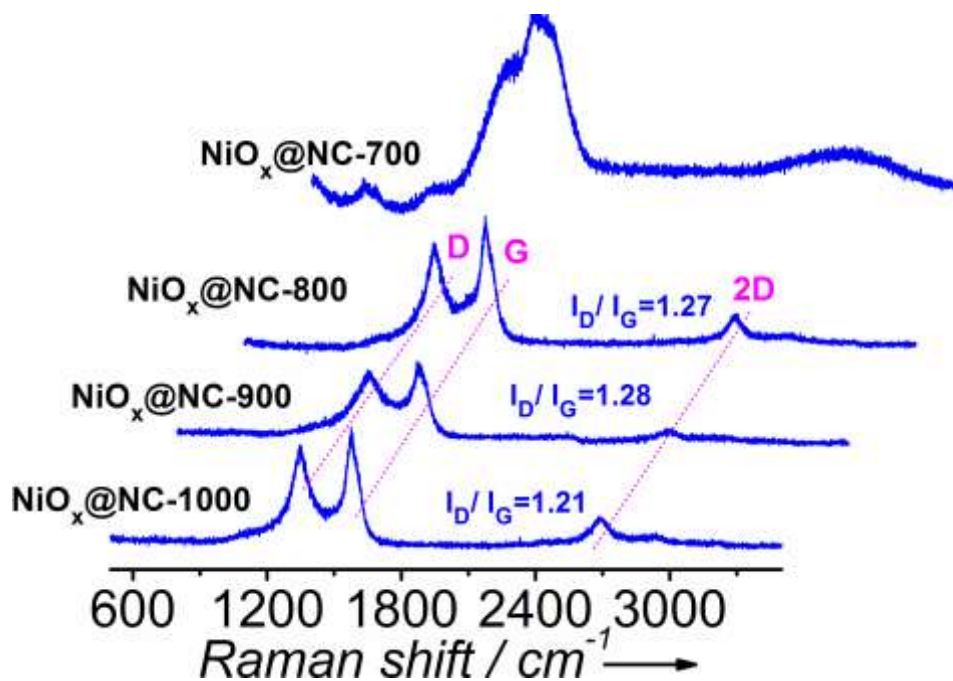

**Figure S10.** Raman spectra of samples calcinated at different temperatures, 1.11 g Ni(NO<sub>3</sub>)<sub>2</sub>·6H<sub>2</sub>O, 1 h.

On the basis of Raman data (Figure S10), the graphitization degrees of catalysts were determined by obtaining the ratio of intensities of the two bands (i.e.,  $I_D/I_G$ ). The  $I_D/I_G$  ratio of NiO<sub>x</sub>@NC-800 ( $I_D/I_G=1.27$ ) is similar to that of NiO<sub>x</sub>@NC-900 ( $I_D/I_G=1.28$ ), and NiO<sub>x</sub>@NC-1000 ( $I_D/I_G=1.21$ ).

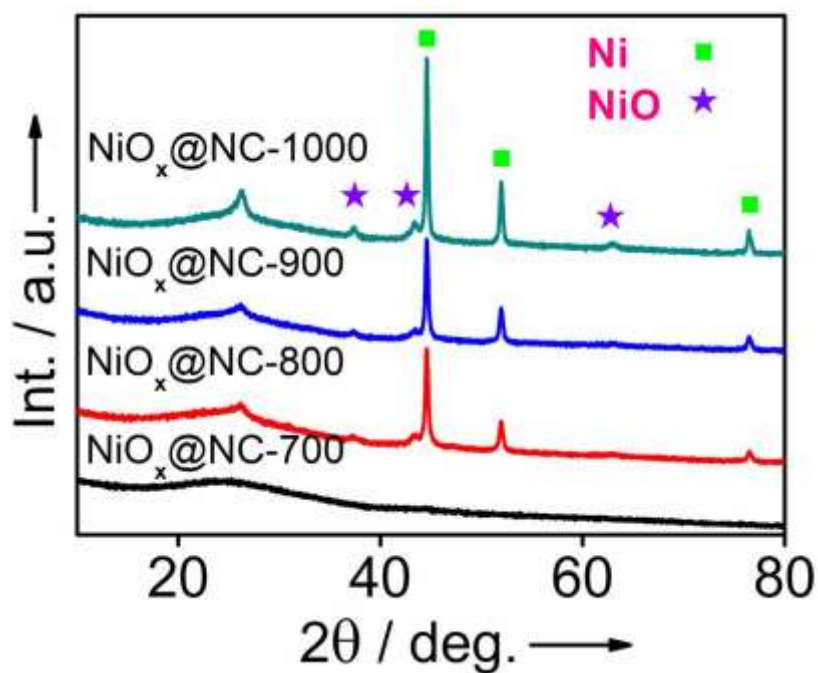

**Figure S11.** XRD of samples with 1.11 g Ni(NO<sub>3</sub>)<sub>2</sub>·6H<sub>2</sub>O calcinated under different temperature for 1 h.

As shown in Figure S11, NiO<sub>x</sub>@NC-700 only showed the diffraction peaks of graphite, owing to the formed Ni or NiO with lower crystallinity and smaller particle size under 700 °C.

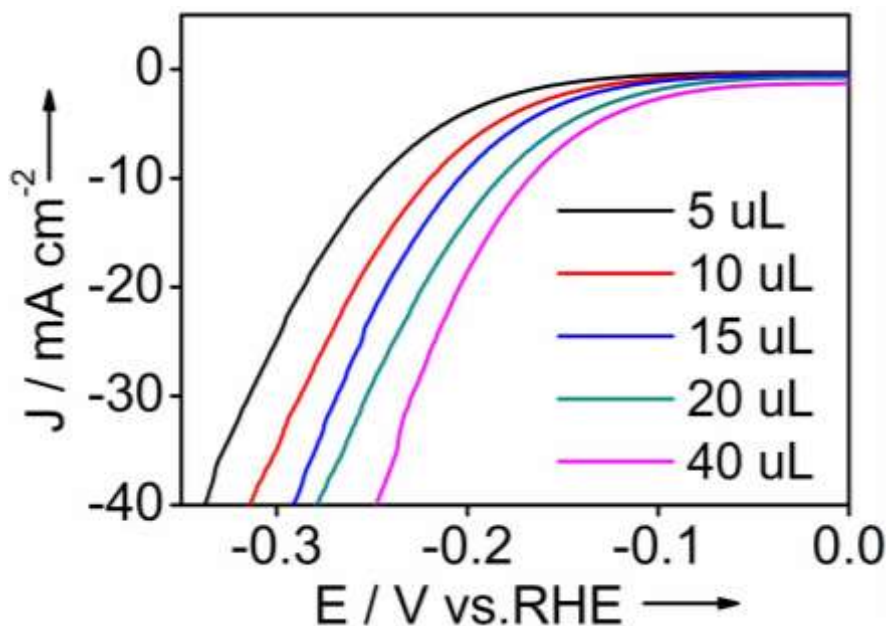

**Figure S12.** Polarization curves of NiO<sub>x</sub>@BCNTs in 1 M KOH with different loading mass.

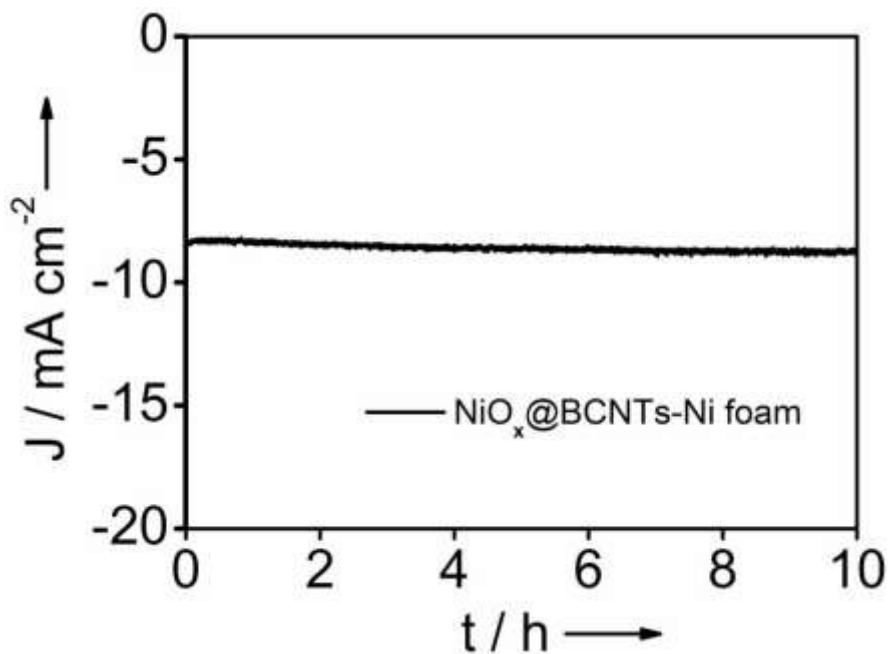

**Figure S13.** Chronoamperometric response of NiO<sub>x</sub>@BCNTs-Ni foam. The corresponding LSV data in Figure 3b was obtained after i-t test.

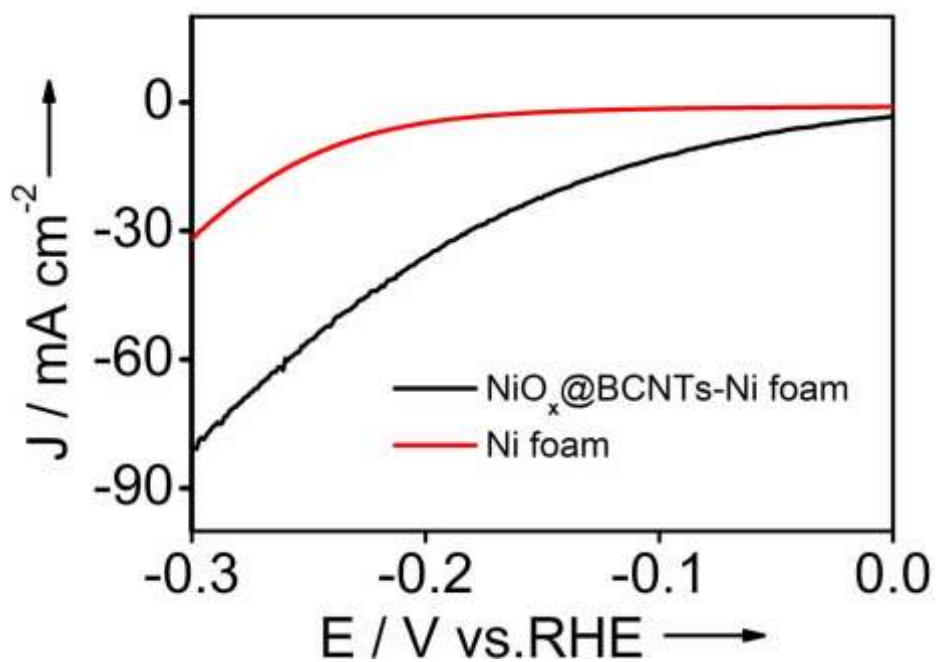

**Figure S14.** LSV curves of NiO<sub>x</sub>@BCNTs on Ni foam and Ni foam.

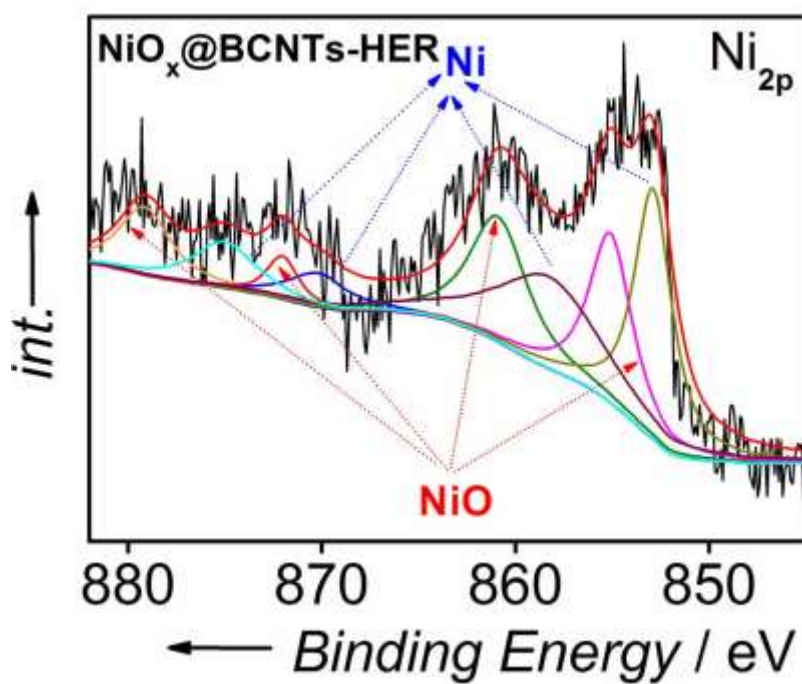

**Figure S15.** High-resolution Ni<sub>2p</sub> XPS spectra of NiO<sub>x</sub>@BCNTs-HER.



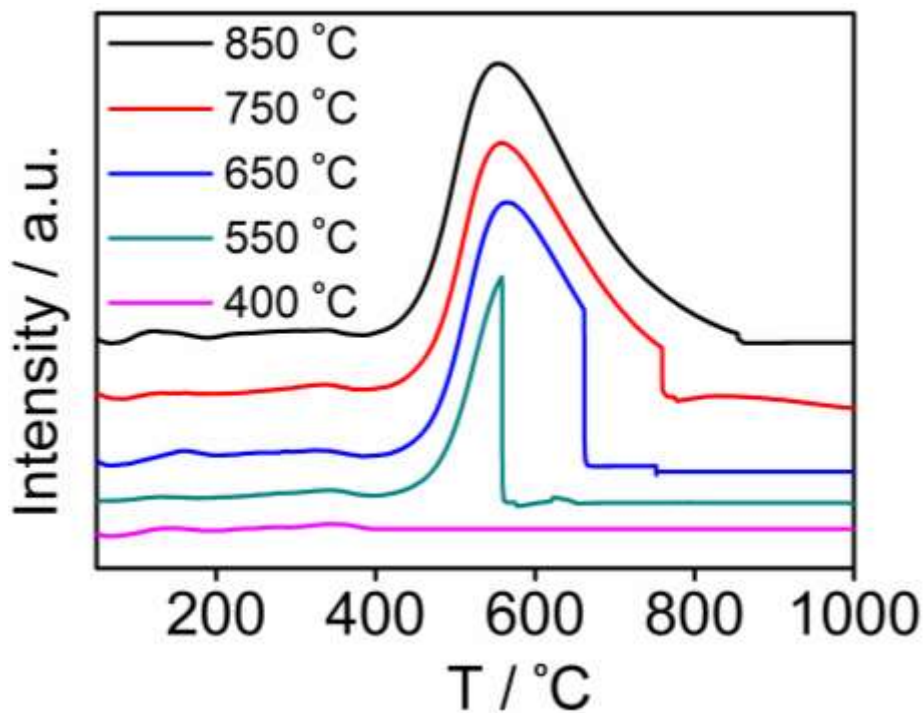

**Figure S16.** H<sub>2</sub>-TPR plots of NiO<sub>x</sub>@BCNTs treated with different temperatures.

In order to prevent the H<sub>2</sub> to continue reducing NiO during the cooling process, we immediately switch H<sub>2</sub> to He after reaching the target final temperature. When there is no H<sub>2</sub> in the gas circuit, the curve will show a sudden change in signals.

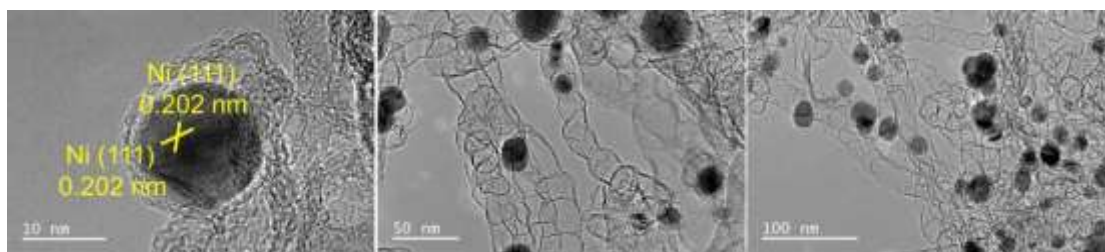

**Figure S17.** HRTEM images of NiO<sub>x</sub>@BCNTs treated via H<sub>2</sub>-TPR process under 400 °C.

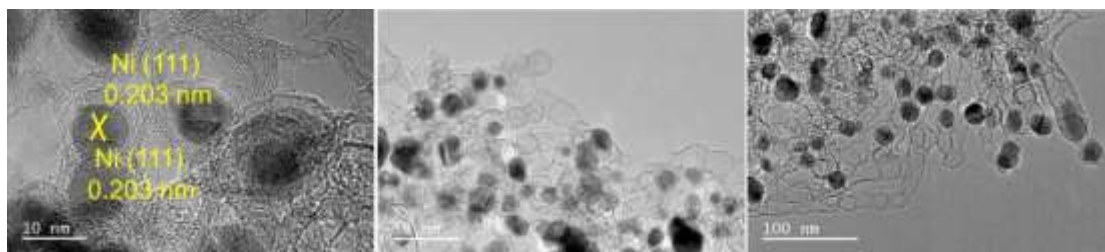

**Figure S18.** HRTEM images of NiO<sub>x</sub>@BCNTs treated via H<sub>2</sub>-TPR process under 550 °C.

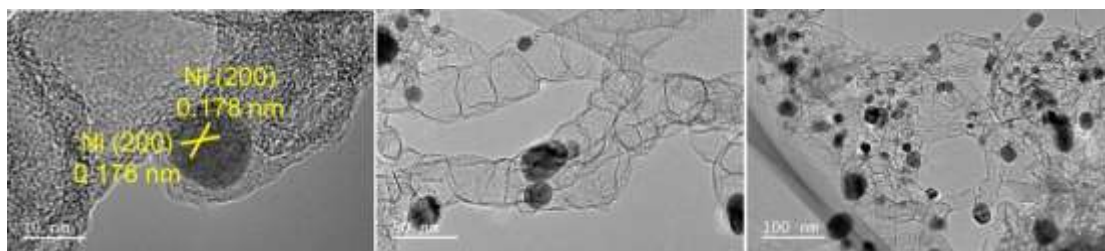

**Figure S19.** HRTEM images of NiO<sub>x</sub>@BCNTs treated via H<sub>2</sub>-TPR process under 650 °C.

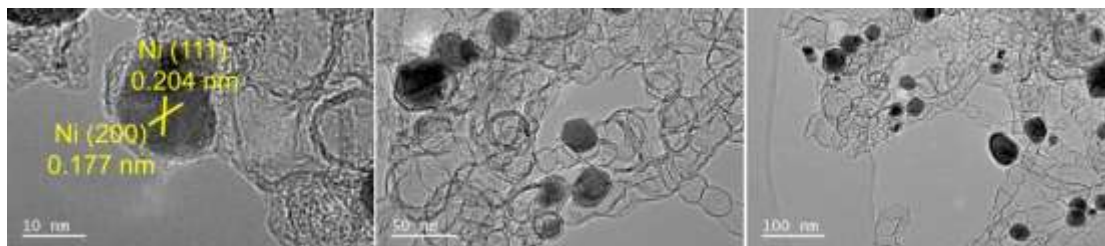

**Figure S20.** HRTEM images of NiO<sub>x</sub>@BCNTs treated via H<sub>2</sub>-TPR process under 750 °C.

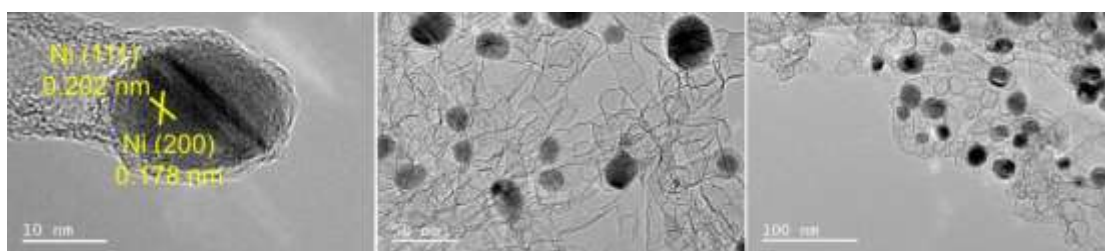

**Figure S21.** HRTEM images of NiO<sub>x</sub>@BCNTs treated via H<sub>2</sub>-TPR process under 850 °C.

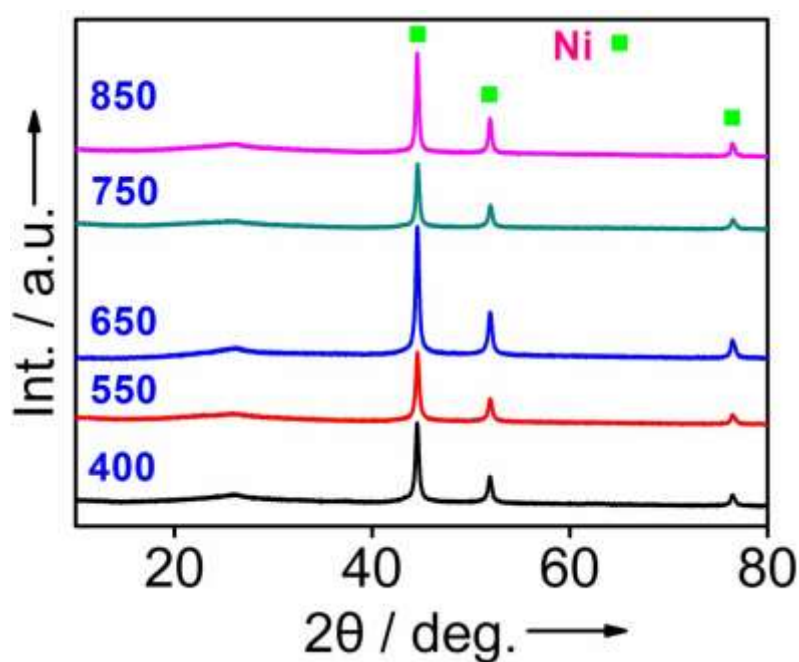

**Figure S22.** XRD patterns of NiO<sub>x</sub>@BCNTs treated via H<sub>2</sub>-TPR process under different temperature.

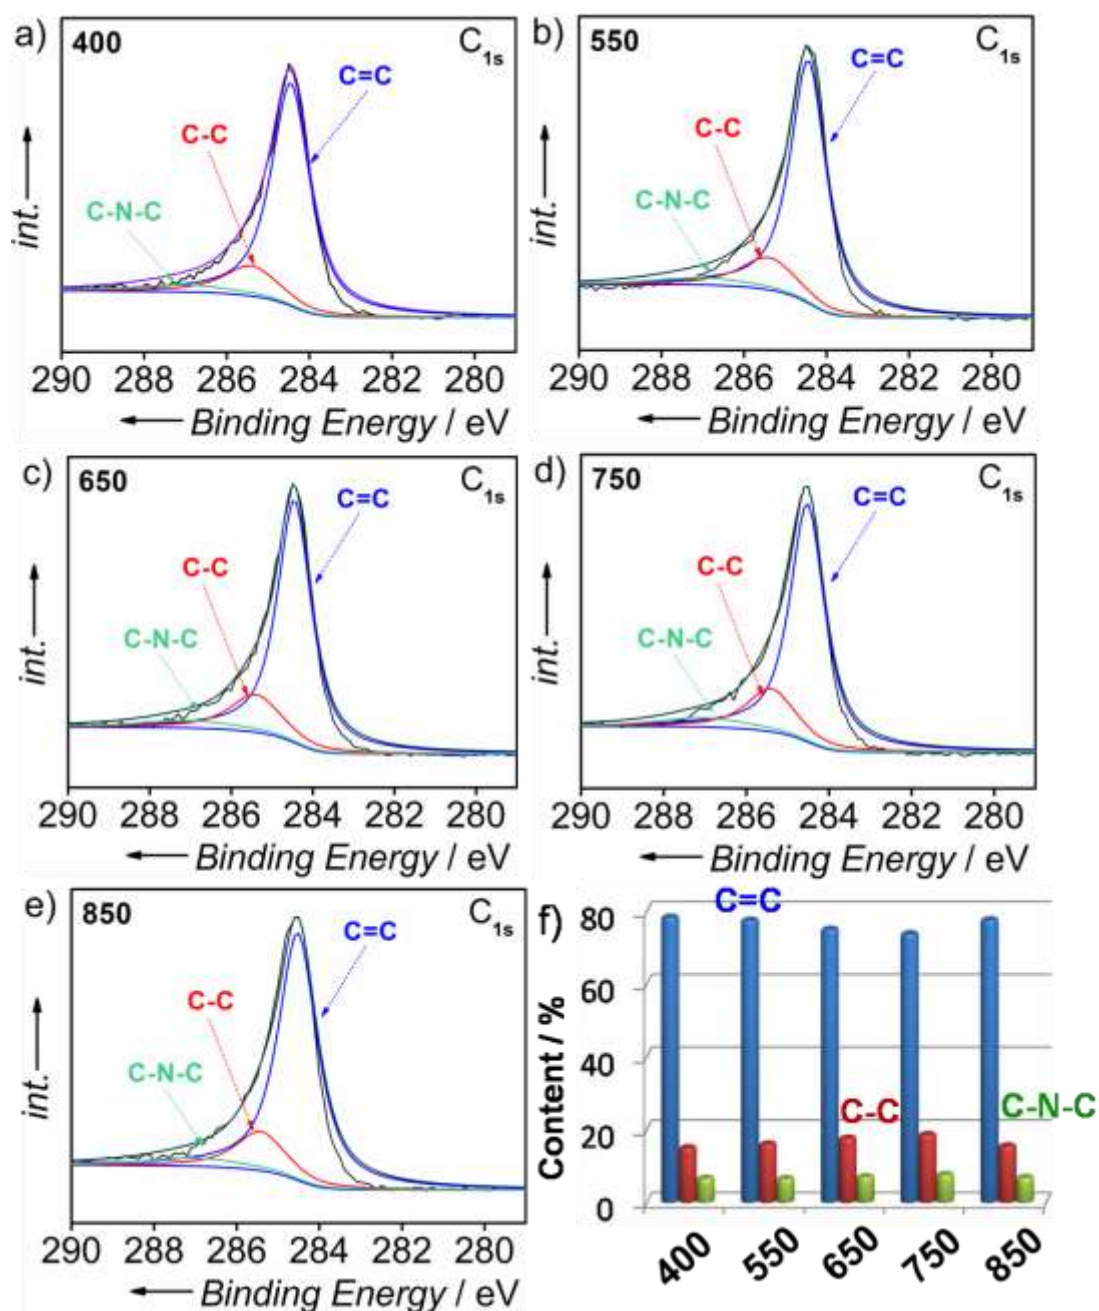

**Figure S23.** a, b, c, d, e) High-resolution  $C_{1s}$  XPS spectra of  $NiO_x@BCNTs$  treated via  $H_2$ -TPR process under different temperature. f) The content of the  $C=C$ ,  $C-C$  and  $C-N-C$  species in products.

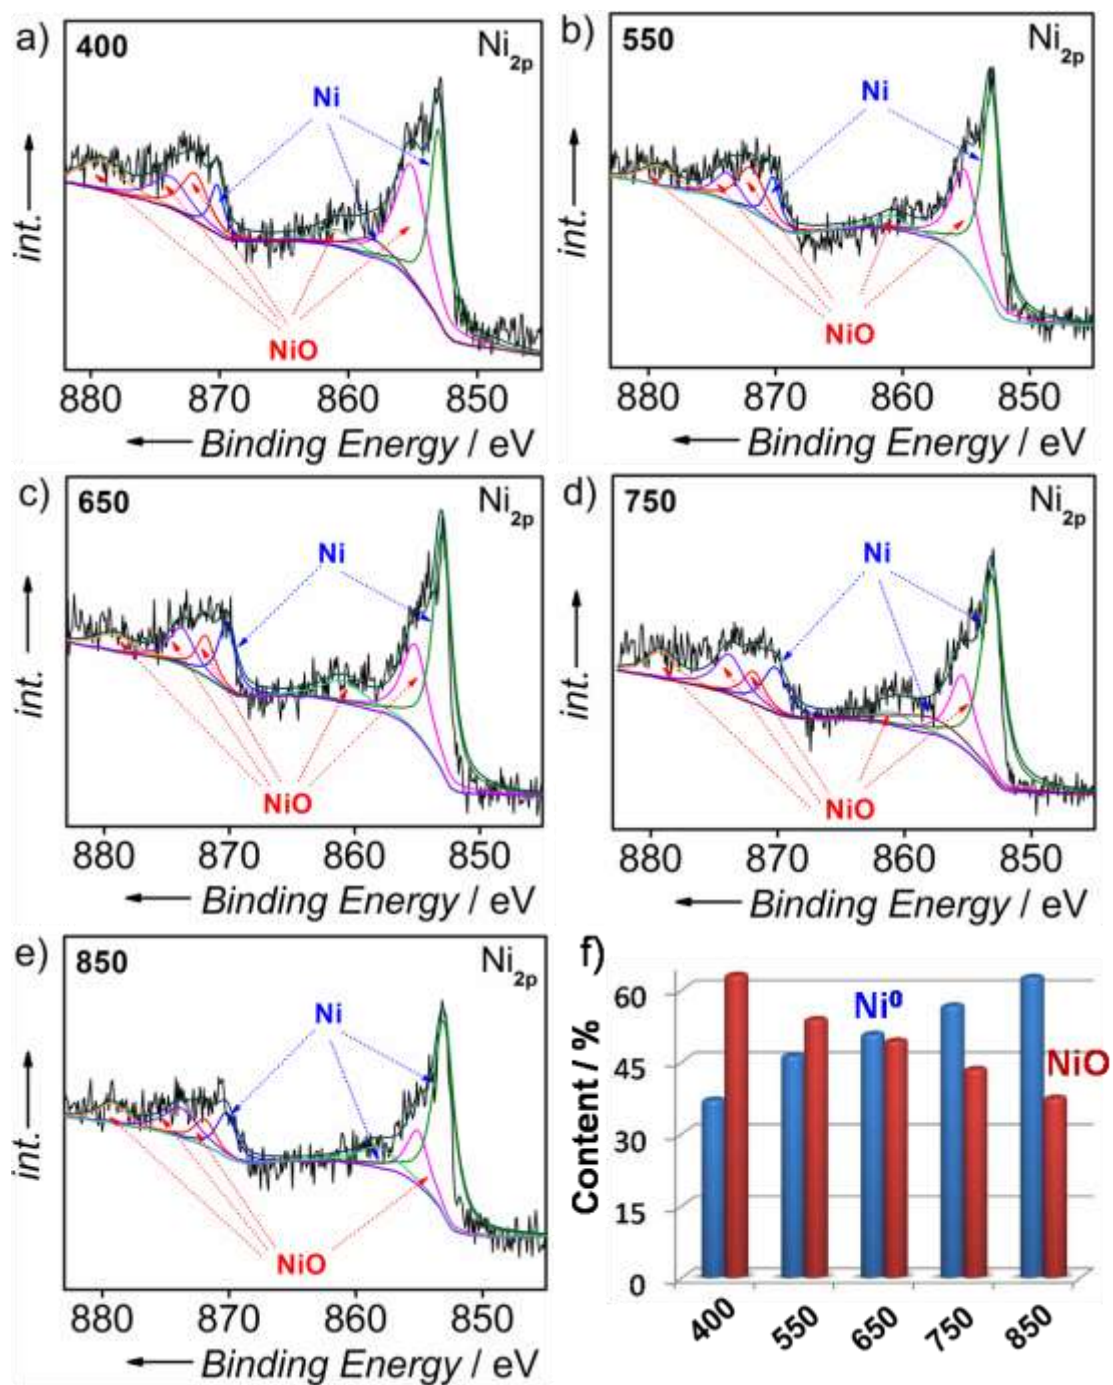

**Figure S24.** a, b, c, d, e) High-resolution  $\text{Ni}_{2p}$  XPS spectra of  $\text{NiO}_x$ @BCNTs treated via  $\text{H}_2$ -TPR process under different temperature. f) The content of the Ni and NiO species in products.



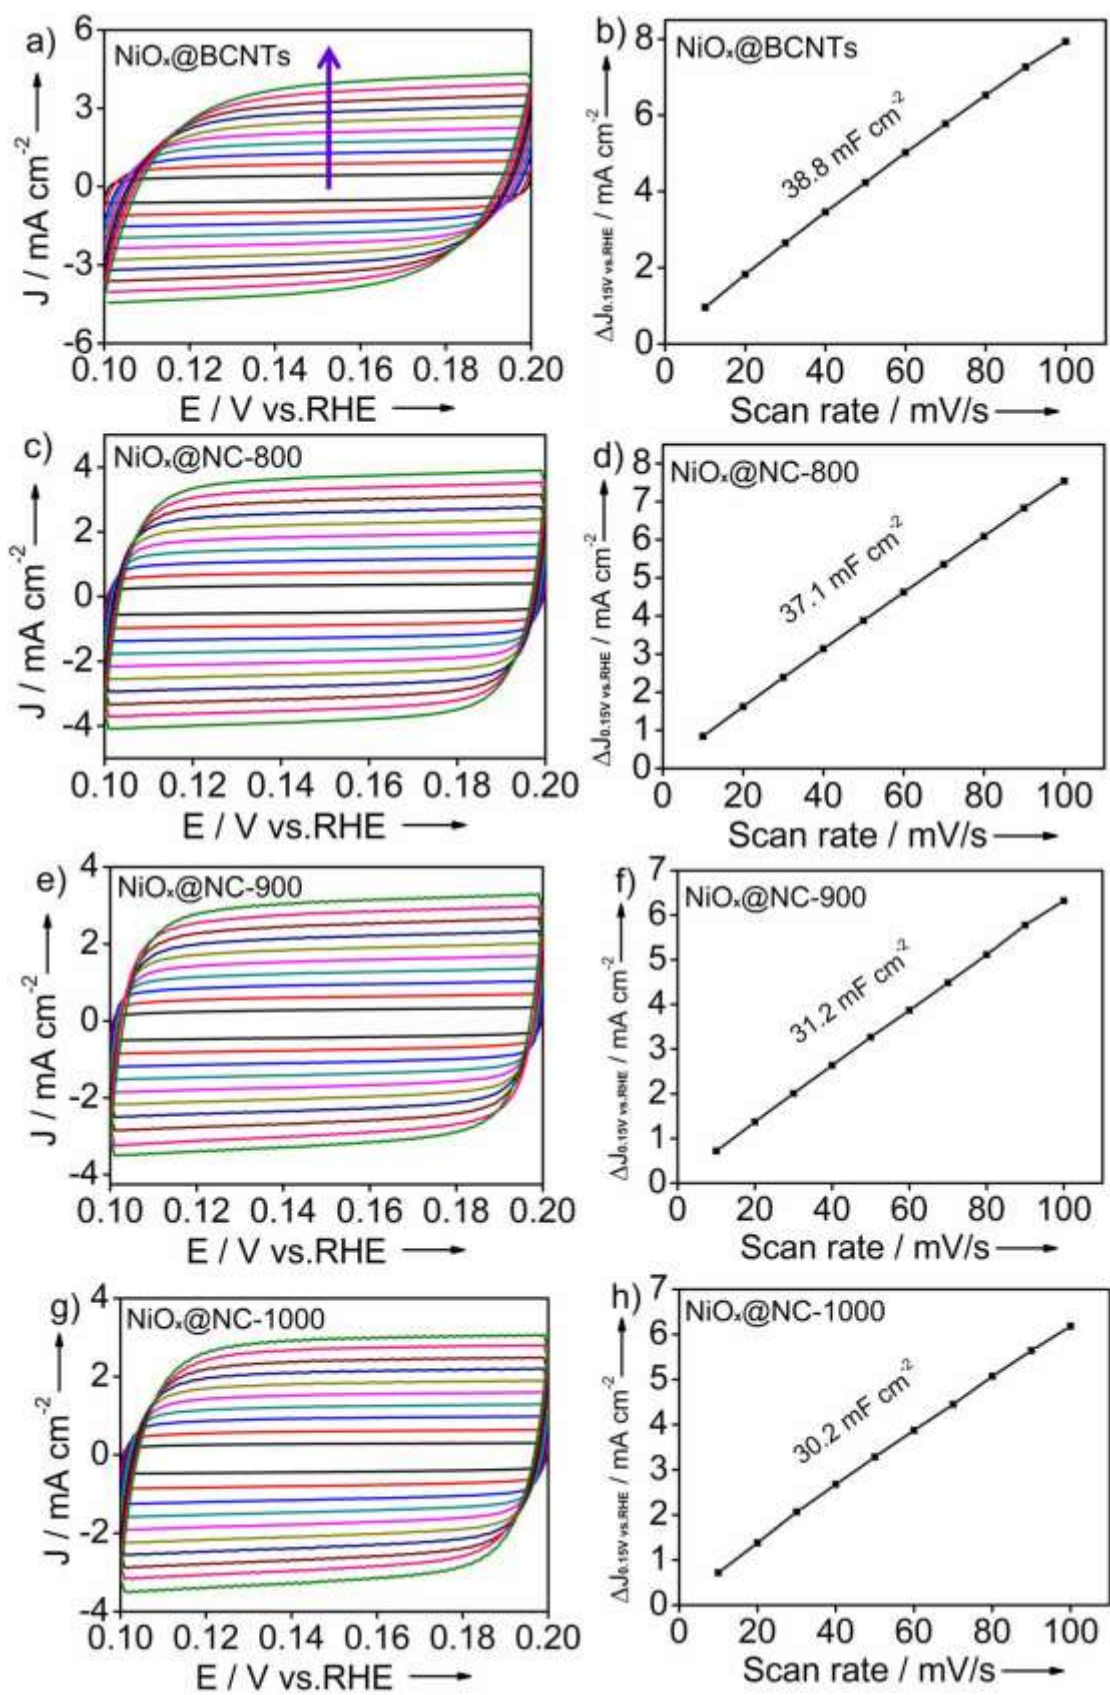

**Figure S25.** a, c, e, g) Cyclic voltammograms of NiO<sub>x</sub>@BCNTs, NiO<sub>x</sub>@NC-800, NiO<sub>x</sub>@NC-900 and NiO<sub>x</sub>@NC-1000, respectively, at different scan rates under



overpotential from 0.1 to 0.2 V (vs.RHE). The purple arrow indicates the scan rate from 10 mV to 100 mV. b, d, f, h) The differences in current density variation ( $\Delta J = J_a - J_c$ ) at an overpotential of 0.15 V plotted against scan rate fitted to a linear regression enables the estimation of  $C_{dl}$ , where the slope is twice  $C_{dl}$ .

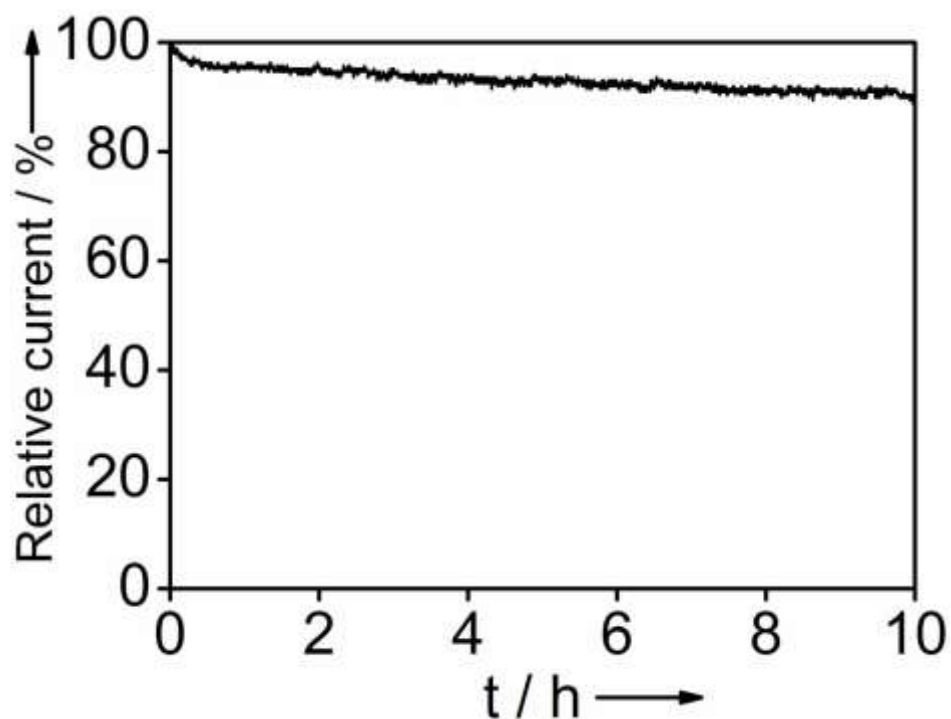

**Figure S26.** Current-time (i-t) chronoamperometric response of NiO<sub>x</sub>@BCNTs in 1 M KOH.

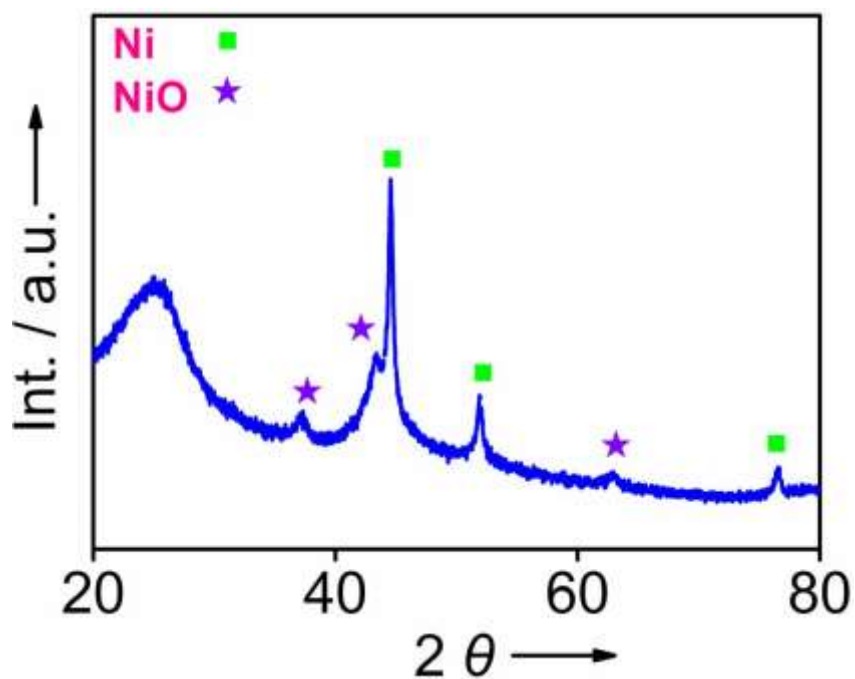

**Figure S27.** XRD patterns of NiO<sub>x</sub>@BCNTs after long-term HER test.

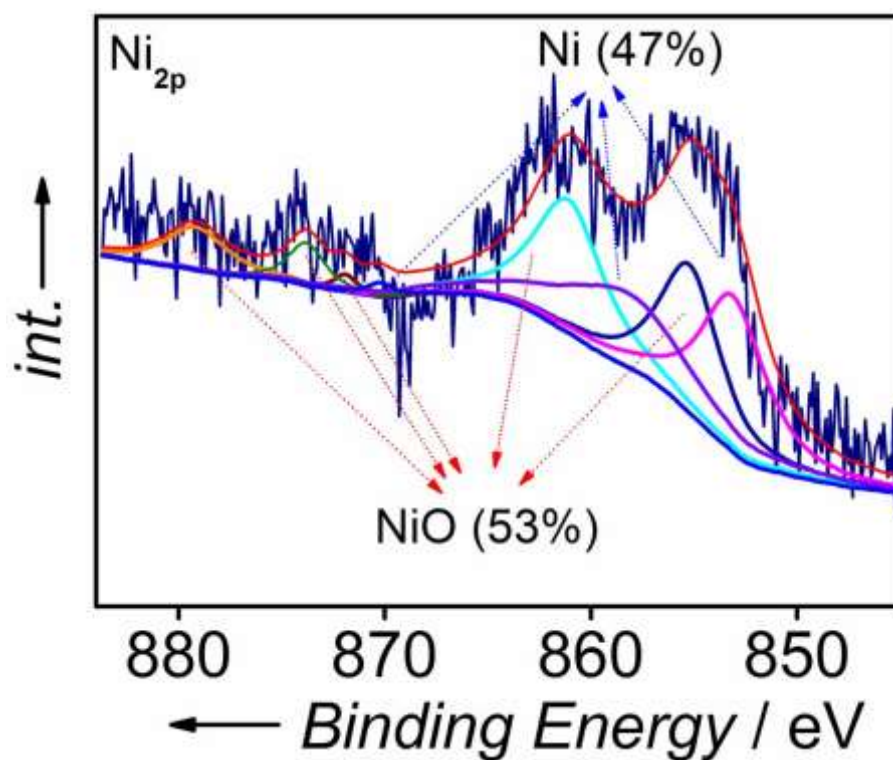

**Figure S28.** High-resolution  $\text{Ni}_{2p}$  XPS spectra of  $\text{NiO}_x$ @BCNTs after long-term HER test.

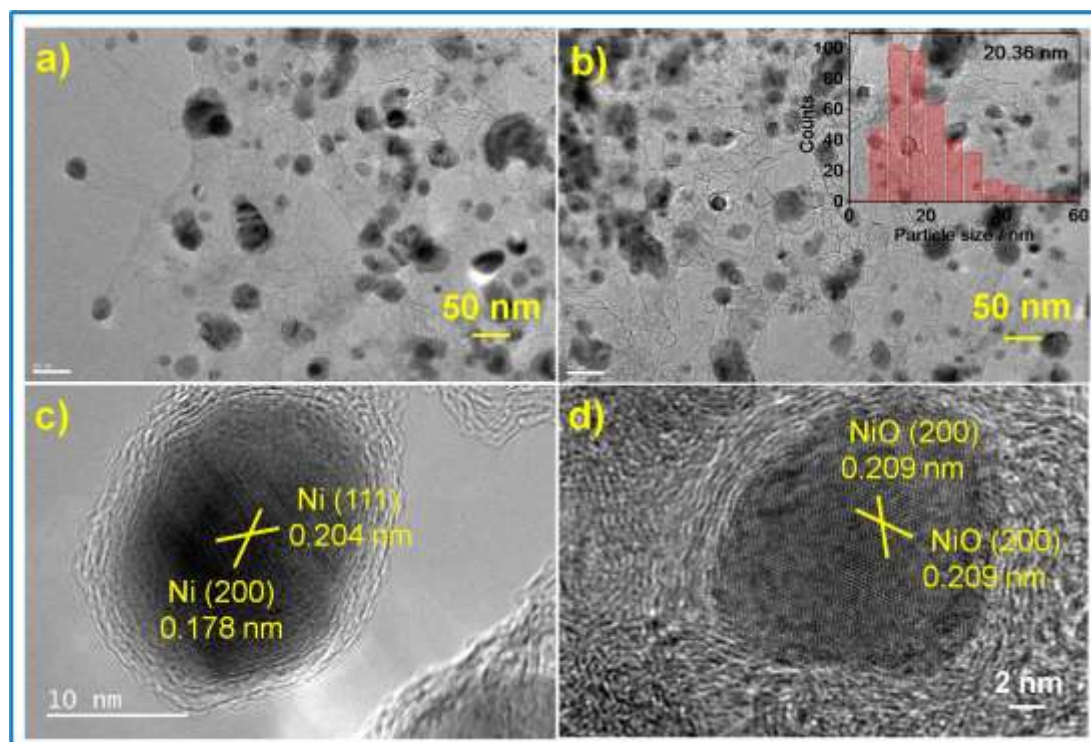

**Figure S29.** TEM and HRTEM images of  $\text{NiO}_x$ @BCNTs after long-term HER test

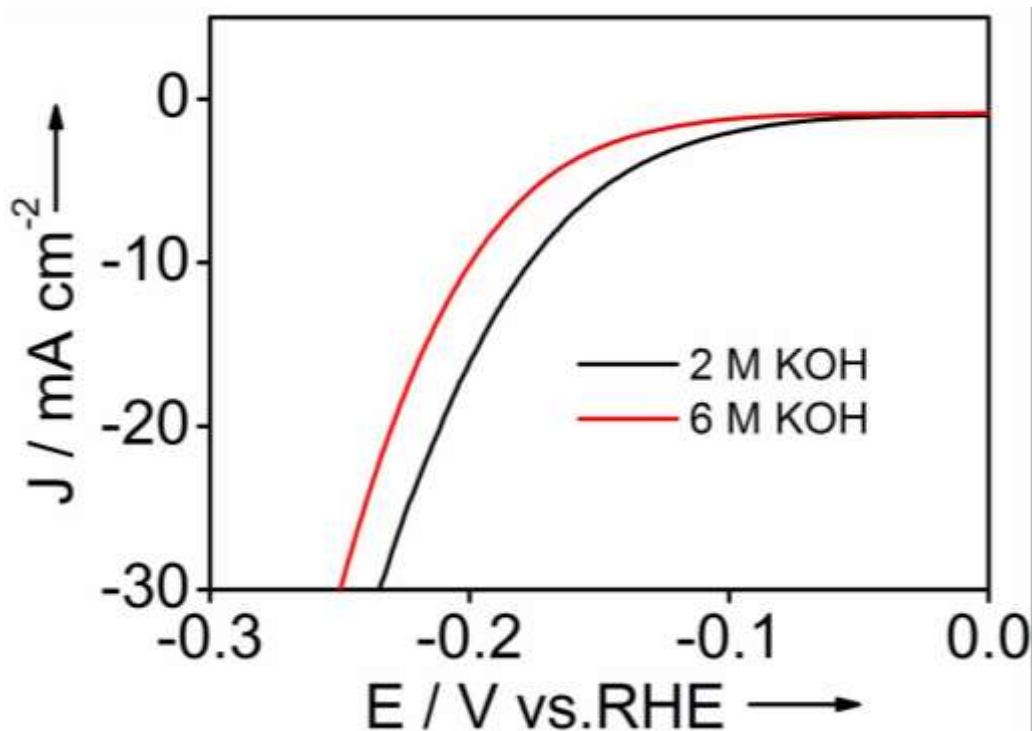

**Figure S30.** Polarization curves of NiO<sub>x</sub>@BCNTs in 2 M KOH and 6 M KOH.

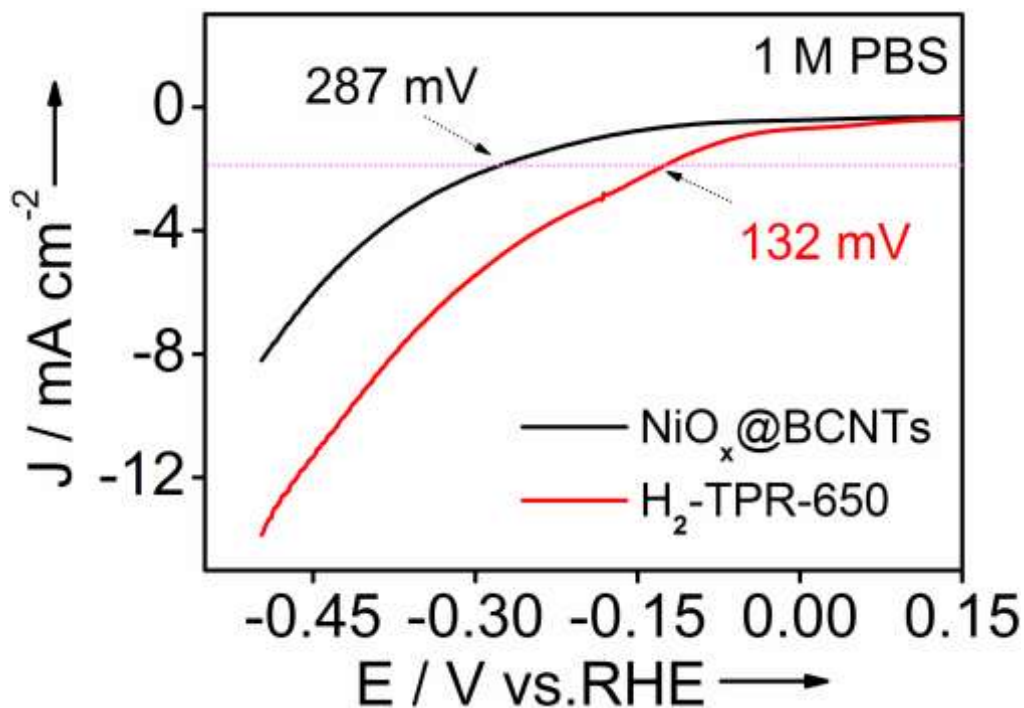

**Figure S31.** Polarization curves of NiO<sub>x</sub>@BCNTs and H<sub>2</sub>-TPR-650 in 1 M PBS.

#### Computational section

Calculations were performed by using periodic, spin-polarized DFT as implemented in Vienna ab initio program package (VASP).<sup>3-4</sup> The electron-ion interactions were described by the projector augmented wave (PAW) method proposed by Blöchl<sup>5</sup> and implemented by Kresse.<sup>6</sup> PBE functional<sup>7</sup> was used as

exchange-correlation functional approximation and a plane wave basis set with an energy cutoff of 400 eV was chosen. A p (6×6) four-layer slab with (1 1 1) surface cleaved was modeled as the active surface for the inherent Ni<sup>0</sup>. As for the Ni/NiO interface model, a p (5×5) four-layer (1 1 1) NiO slab was embedded under one p (6×6) single layer (1 1 1) Ni<sup>0</sup> slab (see Figure S32). Only gamma k-point is used for the Brillouin zone sampling for these two models. A p (3×3) four-layer NiO slab with (100) surface was modeled for bulk NiO since this face is most stable.<sup>8</sup> A (2×2×1) k-point sampling is used for NiO model to ensure accuracy. Hubbard-U correction (DFT+U method)<sup>9</sup> was applied to improve the description of localized Ni d-electrons for Ni<sup>0</sup>/NiO interface model. A value of U = 6.3 eV was set since this value is considered reasonable.<sup>10-11</sup> The bottom two layers were kept fixed during the structure optimization. Only gamma k-point is used for the Brillouin zone sampling. The periodic condition is employed along the x and y direction. The vacuum space along the z direction was set to be 15 Å. The relaxation is stopped when the force residue on the atom is smaller than 0.02 eV/Å. The hydrogen binding energy is defined using the equation:<sup>12</sup>

$$E_{\text{atomic}}^{\text{H}} = E_{\text{H-slab}} - E_{\text{slab}} - 0.5 \times E_{\text{H}_2(\text{g})}$$

where  $E_{\text{atomic}}^{\text{H}}$  is the binding energy of atomic hydrogen on the given slab,  $E_{\text{H-slab}}$  is the energy of the slab with one hydrogen adsorbed,  $E_{\text{slab}}$  is the energy of the slab in a vacuum, and  $E_{\text{H}_2(\text{g})}$  is the energy of hydrogen in the gas phase.

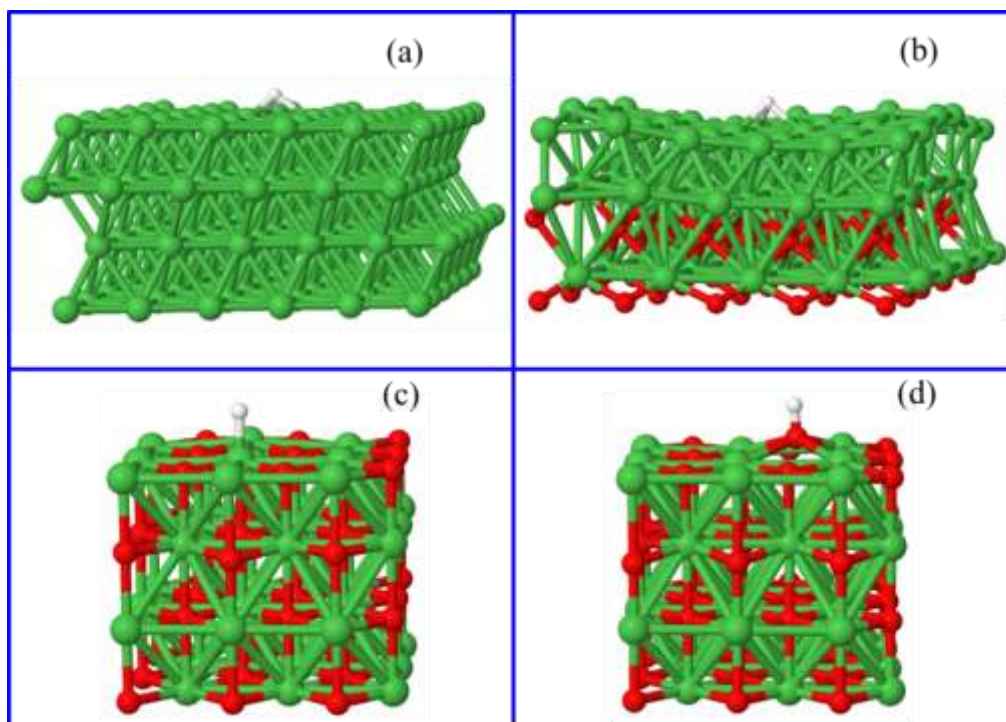

**Figure S32.** Hydrogen binding on (a) inherent Ni<sup>0</sup> (111); (b) Ni/NiO (111) interface; (c) Ni site of NiO(100); (d) O site of NiO (100). Cyan: nickel; red: oxygen; white: hydrogen.

## Reference

- (1) Wang, Y.; Wang, X.; Antonietti, M. Polymeric Graphitic Carbon Nitride as a Heterogeneous Organocatalyst: From Photochemistry to Multipurpose Catalysis to Sustainable Chemistry. *Angew. Chem., Int. Ed.* **2012**, *51*, 68-89.
- (2) Duan, J. J.; Chen, S.; Jaroniec, M.; Qiao, S. Z. Porous C<sub>3</sub>N<sub>4</sub> Nanolayers@N-Graphene Films as Catalyst Electrodes for Highly Efficient Hydrogen Evolution. *ACS Nano* **2015**, *9*, 931-940.
- (3) Kresse, G.; Furthmüller, J. Efficiency of Ab-initio Total Energy Calculations for Metals and Semiconductors Using a Plane-wave Basis Set. *Comput. Mater. Sci.* **1996**, *6*, 15-50.
- (4) Kresse, G.; Furthmüller, J. Efficient Iterative Schemes for Ab Initio Total-energy Calculations Using a Plane-wave Basis Set. *Phys. Rev. B* **1996**, *54*, 11169-11186.
- (5) Blöchl, P. E. Projector Augmented-wave Method. *Phys. Rev. B* **1994**, *50*, 17953-17979.
- (6) Kresse, G.; Joubert, D. From Ultrasoft Pseudopotentials to the Projector Augmented-wave Method. *Phys. Rev. B* **1999**, *59*, 1758-1775.
- (7) Perdew, J. P.; Burke, K.; Ernzerhof, M. Generalized Gradient Approximation Made Simple. *Phys. Rev. Lett.* **1996**, *77*, 3865-3868.
- (8) Pacchioni, G.; Di Valentin, C.; Dominguez-Ariza, D.; Illas, F.; Bredow, T.; Kluner, T.; Staemmler, V. Bonding of NH<sub>3</sub>, CO, and NO to NiO and Ni-doped MgO: a Problem for Density Functional Theory. *J. Phys.: Condens. Matter* **2004**, *16*, S2497-S2507.
- (9) Liechtenstein, A. I.; Anisimov, V. I.; Zaanen, J. Density-functional Theory and Strong Interactions: Orbital Ordering in Mott-Hubbard Insulators. *Phys. Rev. B* **1995**, *52*, R5467-R5470.
- (10) Rohrbach, A.; Hafner, J.; Kresse, G. Molecular Adsorption on the Surface of Strongly Correlated Transition-metal Oxides: A Case Study for CO/NiO(100). *Phys. Rev. B* **2004**, *69*, 075413-1-075413-13.
- (11) Rohrbach, A.; Hafner, J. Molecular Adsorption of NO on NiO(100): DFT and DFT+U Calculations. *Phys. Rev. B* **2005**, *71*, 045405-1-045405-7.
- (12) Nørskov, J. K.; Bligaard, T.; Logadottir, A.; Kitchin, J. R.; Chen, J. G.; Pandelov, S.; Stimming, U. Trends in the Exchange Current for Hydrogen Evolution. *J. Electrochem. Soc.* **2005**, *152*, J23-J26.
